# Supplementary material for: Boosting the ammonia synthesis activity of ceria-supported Ru catalysts achieved through trace Pr addition
Source: Royal Society of Chemistry journal article supplement (doi:10.1039/d3cc03130f), 2023-01-01
Supplement: d3cc03130f1.pdf [file d3cc03130f1.pdf]

## Supporting Information

### ***Boosting ammonia synthesis activity of ceria-supported Ru catalyst achieved through trace Pr addition***

Chunyan Li<sup>a,b</sup>, Zecheng Zhang<sup>b</sup>, Lingyun Zhou<sup>a</sup>, Biyun Fang<sup>b</sup>, Jun Ni<sup>b</sup>, Jianxin Lin<sup>b</sup>,

Bingyu Lin<sup>\*b</sup>, and Lilong Jiang<sup>\*b</sup>

<sup>a</sup> Key Laboratory of Low-Dimensional Materials and Big Data, School of Chemical Engineering,

Guizhou Minzu University, Guiyang 550025, China

<sup>b</sup> National Engineering Research Center of Chemical Fertilizer Catalyst, College of Chemical

Engineering, Fuzhou University, Fuzhou 350002, Fujian, China

E-mail: bylin@fzu.edu.cn (Bingyu Lin); jll@fzu.edu.cn (Lilong Jiang); Fax: +86 0591-83738808; Tel: +86 0591-

83731234

#### **1. Preparation of Samples**

The CeO<sub>2</sub> and Pr-doped CeO<sub>2</sub> with 0.1% content were prepared using the hydrothermal method. Typically, 8 mmol of Ce(NO<sub>3</sub>)<sub>3</sub>•6H<sub>2</sub>O in 20 mL distilled water was added into 1 mol NaOH aqueous solution (140 mL), and stirred at 50 °C for 0.5 h. The mixture solution was held at 100 °C for 24 h in an autoclave. The separated resultant product was washed with distilled water and ethanol to control the pH to neutral, dried at 60 °C overnight, and finally calcined at 550 °C for 4 h. The Pr-doped CeO<sub>2</sub> simple with the Pr/Ce mole ratio of 0.1% was prepared in a similar procedure.

The Ru catalysts were obtained using ruthenium nitrosyl nitrate solution (1.5% w/v) as Ru precursor by impregnation method, and the loading of Ru was fixed at 3wt%. The as-prepared samples were then reduced in 25%N<sub>2</sub>-75%H<sub>2</sub> at 400 °C for 6 h and labeled as Ru/CeO<sub>2</sub> and Ru/PrCe.

#### **2. Catalysts evaluation and Characterization**

## 2.1 Catalysts evaluation

Ammonia synthesis was carried out in a continuous flow fixed-bed stainless steel reactor (inner diameter = 12 mm). Prior to reaction, the catalyst (0.2 g, 32–60 mesh) was diluted with quartz sand of similar size and reduced in a stoichiometric H<sub>2</sub>–N<sub>2</sub> gas mixture at 500 °C for 6 h. There were no external and internal diffusion limitations under the conditions adopted in this work.<sup>1, 2</sup> Catalyst evaluation was conducted after the reaction was maintained for more than 3 h under a selected condition. The produced ammonia was trapped by sulfuric acid solution and then analyzed by ion chromatography (Thermo Scientific, ICS-600); subsequently, the reaction rates and TOF values were calculated according to the following equations:

$$\text{reaction rate} = \frac{\text{mol of NH}_4^+}{\text{mass of catalyst (g)} \times \text{time (h)}}$$
$$\text{TOF} = \frac{\text{mol of NH}_4^+}{\text{mol of metallic Ru atom} \times \text{time (s)}}$$

## 2.2 Catalysts Characterization

Transmission electron microscopy (TEM) and high-angle annular dark-field scanning transmission electron microscopy (HAADF-STEM) images were obtained by a FEI Tecnai G2 F30 microscope. The Brunauer–Emmett–Teller (BET) surface area, pore volume, and pore size distribution of the samples were measured with an ASAP 2020M instrument using adsorption of N<sub>2</sub> at 77 K. Prior to adsorption analysis, the catalysts were degassed in a flowing N<sub>2</sub> at 300 °C for 3 h. The phase purity and crystal structure of the catalysts were examined by X-ray diffraction (XRD, PANalytical X'Pert3 Powder diffractometer), using Cu K $\alpha$  radiation ( $\lambda=0.154\ 32\ \text{nm}$ ). Raman spectra of samples were acquired on an InVia Reflex Raman microscope equipped with a 532 nm laser.

Diffuse reflectance infrared Fourier transform spectroscopy (DRIFTS) was measured on a Nicolet 6700 spectrometer operated at a resolution of 4 cm<sup>-1</sup> with 32 scans. For CO adsorption measurements, For CO adsorption measurements of fresh catalysts, the samples were reduced in hydrogen at 500 °C for 6 h, then purged with He and cooled down to 50 °C. After the collection of background spectrum, the

sample was exposed to 5% CO/He (50 mL/min) for 10 min. To acquire the information related to deuterium species, the sample was reduced at 500 °C in H<sub>2</sub> and then cooled down to 50 °C in a flow of He.

Hydrogen temperature-programmed reduction (H<sub>2</sub>-TPR) of as-prepared catalysts was carried out on a Micromeritics AutoChem II 2920. The catalyst (100 mg, sieve fraction 0.30–0.56 mm) was pretreated in Ar at 150 °C for 60 min and then cooled to –20 °C. Afterward, the samples were heated in a flow of 10% H<sub>2</sub>/Ar mixture (30 mL min<sup>-1</sup>) to 600 °C at a rate of 10 °C min<sup>-1</sup>. Temperature-programmed desorption (TPD) experiment was also performed using the same AutoChem II 2920 equipment. A sample (100 mg) was reduced in H<sub>2</sub> at 500 °C for 6 h, and then purged with Ar and cooled to 400 °C. Afterwards, the gas flow was switched to H<sub>2</sub> for sample exposure at 400 °C for 1 h. After cooling to 50 °C, the sample was purged with Ar for 1 h, and then heated to 600 °C at a rate of 10, 20 and 30 °C/min.

X-ray photoelectron spectroscopy (XPS) measurement was recorded on an ESCALAB 250Xi photoelectron spectrometer (Thermo Fisher Scientific). Charging effects were corrected by adjusting the main C 1s peak to a position of 284.6 eV. For the fresh catalysts, the sample was first reduced at 500 °C for 6 h in a flow of 5% H<sub>2</sub>/Ar mixture (30 mL/min) in the pretreatment chamber. After cooling down to room temperature, the catalyst was transferred into the analysis chamber for XPS acquisition without exposure to air.

### **3 Computational details**

#### **3.1 Computational methods**

Density functional theory (DFT) executed in the Vienna ab initio simulation package (VASP6.3.3) were used for all the calculations<sup>3-6</sup>. Exchange and correlation were treated within the Perdew-Burke-Ernzerhof (PBE) generalized gradient approximation (GGA)<sup>7</sup>. The valence electrons were described by a plane wave basis set with the kinetic cutoff energy of 400 eV, and the core electrons were replaced by the projector augmented wave (PAW) pseudopotentials<sup>8,9</sup>. DFT + U corrections were applied to describe

the 4f orbitals of Ce and Pr with the value of  $U - J = 4.5$  eV and 6.0 eV, respectively, which were proposed by previous works<sup>10, 11</sup>. The Hellman-Feynman forces on each ion were lower than 0.03 eV/Å for all the structures.

The adsorption energy ( $\Delta E_{\text{ads}}$ ) was given by Eq(1), in which  $E_{\text{total}}$  was the total energy of the whole system upon adsorption,  $E_{\text{mol}}$  was the energy of the gas-phase molecule, and  $E_{\text{slab}}$  was the energy of the clean slab.

$$\Delta E_{\text{ads}} = E_{\text{total}} - (E_{\text{slab}} + E_{\text{mol}}) \quad \text{Eq(1)}$$

The energy for the formation of oxygen vacancy ( $\Delta E_{\text{Ovac}}$ ) was calculated by Eq(2).

$$\Delta E_{\text{Ovac}} = (E_{\text{slab-Ovac}} + E_{\text{O}}) - E_{\text{slab}} \quad \text{Eq(2)}$$

Where  $E_{\text{O}}$  and  $E_{\text{slab-O}}$  represented the energies of O atom and slab without the O atom.

### 3.2 Theoretical models

The CeO<sub>2</sub>(111) surface was modelled by a (3×3) supercell with symmetric nine-layer, which was separated by a 15 Å vacuum layer, and a 3×3×1 Monkhorst-Pack procedure<sup>12</sup>. This model is equal to three stoichiometric layers of CeO<sub>2</sub>. The Pr modified model was constructed by replacing a Ce in the top layer of CeO<sub>2</sub>(111), denoted as PrCeO<sub>2</sub>(111) (see Fig. Sx). Four-layer Ru(0001) was constructed with (3 × 3) supercell. Due to the complexity of the catalysts synthesized in the experiment, a relatively simplified model was used to decouple the role of Pr. In order to obtain data faster, we used a single Ru adsorbed on the surface before and after Pr modification to form a Ru catalyst loaded on CeO<sub>2</sub>. We put Ru on a oxygen vacancy to get the Ru model, similar with previous work<sup>13</sup>.

## 4. Mass and Heat Transfer Calculations for Ammonia Synthesis over Ru/CePr

### Mass and Heat Transfer Calculations for Ammonia Synthesis on Ru/CePr

Mears Criterion for External Diffusion (Fogler, p841; Mears, 1971)

$$\text{If } \frac{-r_A' \rho_b R n}{k_c C_{Ab}} < 0.15, \text{ then external mass transfer effects can be neglected.}$$

$$-r_A' = \text{reaction rate of nitrogen, kmol/kg-cat} \cdot \text{s}$$

$n$  = reaction order with respect to N<sub>2</sub> (e.g. K. Aika et al, Appl. Catal., **28**(1986) 57–68).

$R$  = catalyst particle radius, m

$\rho_b$  = bulk density of catalyst bed, kg/m<sup>3</sup>

$C_{Ab}$  = bulk gas concentration of nitrogen, kmol/m<sup>3</sup>

$k_c$  = mass transfer coefficient, m/s

$$\frac{-r'_A \rho_b R n}{k_c C_{Ab}} = [3.3 \times 10^{-6} \text{ kmol-N}_2/\text{kg-cat}\cdot\text{s}] [910 \text{ kg/m}^3] [3 \times 10^{-4} \text{ m}] [1] / ([1.7 \text{ m/s}] * [0.045$$

kmol/m<sup>3</sup>)] = **1.2x10<sup>-5</sup> < 0.15 {Mears for External Diffusion}**

Weisz-Prater Criterion for Internal Diffusion (Fogler, p839)

If  $C_{WP} = \frac{-r'_A \rho_c R^2}{D_e C_{Ab}} < 1$ , then internal mass transfer effects can be neglected.

$-r'_A$  = reaction rate of nitrogen, kmol/(kg-cat·s)

$\rho_c$  = solid catalyst density (kg m<sup>-3</sup>)

R = catalyst particle radius, m

$\rho_b$  = bulk density of catalyst bed, kg/m<sup>3</sup>

$C_{Ab}$  = bulk gas concentration of nitrogen, kmol/m<sup>3</sup>

$k_c$  = mass transfer coefficient, m/s

$D_e$  = effective gas-phase diffusivity, m<sup>2</sup>/s

$$C_{WP} = \frac{-r'_A \rho_c R^2}{D_e C_{Ab}} = [3.3 \times 10^{-6} \text{ kmol-N}_2/\text{kg-cat}\cdot\text{s}] \times [4 \times 10^3 \text{ kg-cat/m}^3] \times [3 \times 10^{-4} \text{ m}]^2 / ([3.34$$

$\times 10^{-6} \text{ m}^2/\text{s}] \times [0.045 \text{ kmol/m}^3]) = \mathbf{7.9 \times 10^{-3} < 1}$  {Weisz-Prater Criterion for Internal

**Diffusion}**

Mears Criterion for External (Interphase) Heat Transfer (Fogler, p842)

$$\left| \frac{-\Delta H_r (-r_A') \rho_b R E}{h_i T_b^2 R_g} \right| < 0.15$$

[136.9 kJ/mol × 3.3 × 10<sup>-6</sup> kmol-N<sub>2</sub>/(kg-cat·s) × 910 kg-cat/m<sup>3</sup> × 3 × 10<sup>-4</sup> m × 150 kJ/mol] / [185.3

kJ/m<sup>2</sup>·K·s × 673<sup>2</sup> K<sup>2</sup> × 8.314 × 10<sup>-3</sup> kJ/mol·K] = 2.7 × 10<sup>-5</sup> < 0.15 {**Mears Criterion for External**

**(Interphase) Heat Transfer}**

Mears Criterion for Combined Interphase and Intraparticle Heat and Mass Transport (Mears,

1971)

$$\frac{-r_A' R^2}{C_{Ab} D_e} < \frac{1 + 0.33\gamma\chi}{|n - \gamma_b \beta_b| (1 + 0.33n\omega)}$$

$$\gamma = \frac{E}{R_g T_s}; \quad \gamma_b = \frac{E}{R_g T_b}; \quad \beta_b = \frac{(-\Delta H_r) D_e C_{Ab}}{\lambda T_b}; \quad \chi = \frac{(-\Delta H_r) - r_A' R}{h_i T_b}; \quad \omega = \frac{-r_A' R}{k_c C_{Ab}}$$

$\gamma$  = Arrhenius number;  $\beta_b$  = heat generation function;

$\lambda$  = catalyst thermal conductivity, W/m.K;

$\chi$  = Damköhler number for interphase heat transport

$\omega$  = Damköhler number for interphase mass transport

$$\frac{-r_A' \rho_b R^2}{C_{Ab} D_e} = [3.3 \times 10^{-6} \text{ kmol-N}_2/\text{kg-cat}\cdot\text{s} \times 910 \text{ kg-cat/m}^3 \times (3 \times 10^{-4})^2 \text{ m}^2] / ([3.34 \times 10^{-6} \text{ m}^2/\text{s}]$$

× [0.045 kmol/m<sup>3</sup>]) = 1.8 × 10<sup>-3</sup>

$$\frac{1 + 0.33\gamma\chi}{|n - \gamma_b \beta_b| (1 + 0.33n\omega)} = 2.25$$

Left member < Right member {**Mears Criterion for Interphase and Intraparticle Heat and Mass Transport**}

Table S1 Catalytic performance of Ru-based catalysts on various supports.

| Samples                                                | Rate<br>( $\mu\text{mol g}^{-1} \text{h}^{-1}$ ) | TOF <sup>a</sup><br>( $\text{Ru atom}^{-1} \text{s}^{-1}$ ) | Reaction<br>conditions | SV<br>( $\text{mL g}^{-1} \text{h}^{-1}$ ) | Re<br>f. |
|--------------------------------------------------------|--------------------------------------------------|-------------------------------------------------------------|------------------------|--------------------------------------------|----------|
| Ru(3%)/CePr                                            | 23 500                                           | $22.6 \times 10^{-3}$                                       | 1MPa, 400 °C           | 36 000                                     | This     |
| Ru(3%)/CeO <sub>2</sub>                                | 16 500                                           | $15.9 \times 10^{-3}$                                       | 1MPa, 400 °C           | 36 000                                     |          |
| Ru(3%)/CePr-CO                                         | 13 000                                           | $12.5 \times 10^{-3}$                                       | 1MPa, 400 °C           | 36 000                                     |          |
| Ru(3%)/Pr <sub>2</sub> O <sub>3</sub>                  | 16 800                                           | $16.2 \times 10^{-3}$                                       | 1MPa, 400 °C           | 36 000                                     |          |
| Ru(3%)/PrO <sub>x</sub> -CeO <sub>2</sub>              | 19 200                                           | $18.5 \times 10^{-3}$                                       | 1MPa, 400 °C           | 36 000                                     |          |
| Ru(3%)/CePr(0.5 mol%Pr)                                | 18 635                                           | $18.0 \times 10^{-3}$                                       | 1MPa, 400 °C           | 36 000                                     | work     |
| Ru(3%)/Ti-Ce-S                                         | 14 580                                           | $14.1 \times 10^{-3}$                                       | 1MPa, 400 °C           | 36 000                                     | 14       |
| Ru(3%)/Ti <sub>0.18</sub> -Ce                          | 18 912                                           | $18.7 \times 10^{-3}$                                       | 1MPa, 400 °C           | 36 000                                     | 15       |
|                                                        | 23 028                                           | $22.7 \times 10^{-3}$                                       | 1MPa, 400 °C           | 72 000                                     |          |
| Ba-Ru(5%)/Al <sub>2</sub> O <sub>3</sub>               | 2 796                                            | $1.7 \times 10^{-3}$                                        | 1MPa, 400 °C           | 36 000                                     | 16       |
|                                                        | 2 083                                            | $1.3 \times 10^{-3}$                                        | 1MPa, 400 °C           | 18 000                                     |          |
| Ru(0.25%)/CeO <sub>2</sub>                             | 1 950                                            | $21.9 \times 10^{-3}$                                       | 1 MPa, 400 °C          | 36 000                                     | 17       |
|                                                        | 2 647                                            | $29.8 \times 10^{-3}$                                       | 1 MPa, 400 °C          | 72 000                                     |          |
| Ru(3%)/CeO <sub>2</sub>                                | 22 075                                           | $21.3 \times 10^{-3}$                                       | 1 MPa, 400 °C          | 36 000                                     |          |
| SC-Ru(1%)/CeO <sub>2</sub>                             | 6 909                                            | $19.6 \times 10^{-3}$                                       | 1MPa, 400 °C           | 36 000                                     | 18       |
| Ru(1%)/CeO <sub>2</sub> -N <sub>2</sub> H <sub>4</sub> | 5 521                                            | $15.6 \times 10^{-3}$                                       | 1MPa, 400 °C           | 36 000                                     | 19       |
| Ru(1%)/CeO <sub>2</sub> -BH                            | 5 454                                            | $15.4 \times 10^{-3}$                                       | 1 MPa, 400 °C          | 36 000                                     | 20       |
| Ru(3%)/Ti <sub>0.18</sub> -Ce                          | 18 912                                           | $18.7 \times 10^{-3}$                                       | 1MPa,400°C             | 36 000                                     |          |
| Ru(10%)/Ba-Ca(NH <sub>2</sub> ) <sub>2</sub>           | 50 000                                           | $14.0 \times 10^{-3}$                                       | 0.9MPa,400°C           | 36 000                                     | 21       |
| Ru(6%)-Cs/MgO                                          | 23 000                                           | $6.5 \times 10^{-3}$                                        | 0.9MPa,360°C           | 36 000                                     |          |
| Ru(10%)/Ba-Ca(NH <sub>2</sub> ) <sub>2</sub>           | 60 400                                           | $16.9 \times 10^{-3}$                                       | 1 MPa, 400 °C          | 36 000                                     |          |
| Ru(9.1%)-Ba/AC                                         | 8 285                                            | $2.6 \times 10^{-3}$                                        | 1 MPa, 400 °C          | 18 000                                     | 22       |
| Ru(6%)-Cs/MgO                                          | 12 117                                           | $5.7 \times 10^{-3}$                                        | 1 MPa, 400 °C          | 18 000                                     |          |
| Ru(4%)/C <sub>12</sub> A <sub>7</sub> :e <sup>-</sup>  | 6 089                                            | $4.3 \times 10^{-3}$                                        | 1 MPa, 400 °C          | 18 000                                     |          |
| Ru(7.8%)/Y <sub>5</sub> Si <sub>3</sub>                | 4 100                                            | $1.5 \times 10^{-3}$                                        | 1 MPa, 400 °C          | 18 000                                     | 23       |
| Ru(4%)/r-CeO <sub>2</sub>                              | 3 830                                            | $2.7 \times 10^{-3}$                                        | 1 MPa, 400 °C          | 18 000                                     | 24       |

|                                                              |        |                       |               |        |    |
|--------------------------------------------------------------|--------|-----------------------|---------------|--------|----|
| Ru(4%)/c-CeO <sub>2</sub>                                    | 1 289  | 0.9×10 <sup>-3</sup>  | 1 MPa, 400 °C | 18 000 |    |
| Ru(4%)/p-CeO <sub>2</sub>                                    | 529    | 0.4×10 <sup>-3</sup>  | 0.9MPa,400°C  | 18 000 |    |
| Ru(5%)/CeO <sub>2</sub>                                      | 7 200  | 4.0×10 <sup>-3</sup>  | 0.9MPa,400°C  | 18 000 | 25 |
| Ru(5%)/MgO                                                   | 1 800  | 1.0×10 <sup>-3</sup>  | 0.1MPa,400°C  | 18 000 |    |
| Ru(1.8%)/LaScSi                                              | 28 00  | ×10 <sup>-3</sup>     | 1 MPa, 400 °C | 18 000 |    |
| Ba-Ru(5%)/Al <sub>2</sub> O <sub>3</sub> -980                | 7 217  | 4.5×10 <sup>-3</sup>  | 5 MPa, 400 °C | 60 000 | 26 |
| Cs-Ru(1%)/MgO                                                | 2 700  | 1.0×10 <sup>-3</sup>  | 5 MPa, 400 °C | 66 000 | 27 |
| Ru(1%)/BaTiO <sub>3</sub>                                    | 4 100  | 1.5×10 <sup>-3</sup>  | 1 MPa, 400 °C | 66 000 |    |
| Ru(5%)/La <sub>0.5</sub> Ce <sub>0.5</sub> O <sub>1.75</sub> | 65 000 | 36.5×10 <sup>-3</sup> | 1 MPa, 400 °C | 72 000 | 28 |
| Ru(5%)/La <sub>0.5</sub> Pr <sub>0.5</sub> O <sub>1.75</sub> | 60 200 | 33.8×10 <sup>-3</sup> | 1 MPa, 400 °C | 72 000 | 29 |

<sup>a</sup> based on total number of Ru atoms



Table S2 The compositions of Ru catalysts obtained from ICP analysis.

| Sample              | Pr (wt.%) | Ru (wt.%)                    |                         |
|---------------------|-----------|------------------------------|-------------------------|
|                     |           | Theoretical value<br>(wt. %) | Actual value<br>(wt. %) |
| Ru/CeO <sub>2</sub> | --        | 2.90                         | 2.40                    |
| Ru/CePr             | 0.08      |                              | 2.35                    |

Table S3 Textural properties of Ru catalysts with different reduction conditions.

| Samples             | Surface area<br>(m <sup>2</sup> g <sup>-1</sup> ) | Pore volume<br>(cm <sup>3</sup> g <sup>-1</sup> ) | Average pore size<br>(nm) |
|---------------------|---------------------------------------------------|---------------------------------------------------|---------------------------|
| CeO <sub>2</sub>    | 71                                                | 0.3                                               | 17                        |
| CePr                | 79                                                | 0.4                                               | 19                        |
| Ru/CeO <sub>2</sub> | 63                                                | 0.3                                               | 20                        |
| Ru/CePr             | 63                                                | 0.4                                               | 24                        |

Table S4 Binding energies and FWHM of the C 1s, O 1s, Ce 3d<sub>5/2</sub> and Ru 3d<sub>5/2</sub> regions for Ru catalysts determined by XPS

| Region               | Ru/CeO <sub>2</sub> |      | Ru/CePr        |      |
|----------------------|---------------------|------|----------------|------|
|                      | Binding energy      | FWHM | Binding energy | FWHM |
| C 1s                 | 284.60              | 1.14 | 284.60         | 1.14 |
|                      | 285.25              | 1.72 | 285.42         | 1.65 |
|                      | 289.04              | 3.07 | 289.09         | 3.15 |
| Ru 3d <sub>5/2</sub> | 279.62              | 0.91 | 279.54         | 0.91 |
|                      | 280.25              | 1.44 | 280.31         | 1.44 |
|                      | 282.69              | 1.94 | 282.74         | 1.94 |
| O 1s                 | 529.15              | 1.12 | 529.15         | 1.04 |
|                      | 531.03              | 1.50 | 531.22         | 1.52 |
| Ce 3d <sub>5/2</sub> | 880.60              | 2.44 | 880.62         | 2.44 |
|                      | 884.57              | 3.50 | 884.78         | 3.50 |
|                      | 882.27              | 1.62 | 882.27         | 1.62 |
|                      | 888.81              | 3.50 | 888.76         | 3.50 |
|                      | 898.10              | 2.08 | 898.08         | 2.08 |

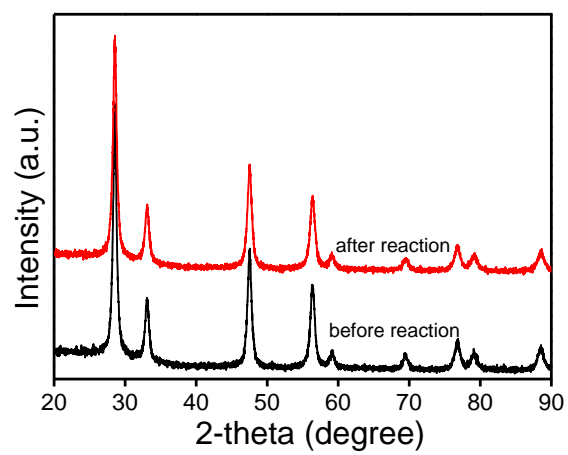

Fig. S1 XRD patterns of Ru/CePr catalyst.

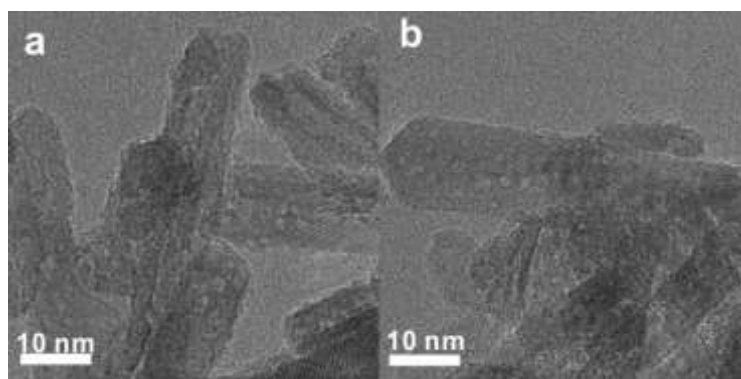

Fig. S2 HRTEM images of Ru/CePr catalyst (a) before reaction and (b) after reaction.

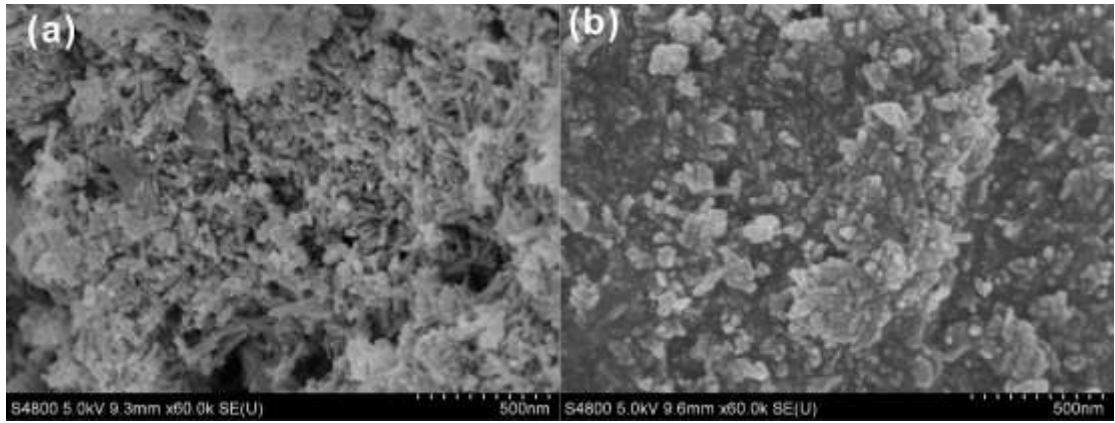

Fig. S3 SEM images of (a) Ru/CeO<sub>2</sub> and (b) Ru/CePr.

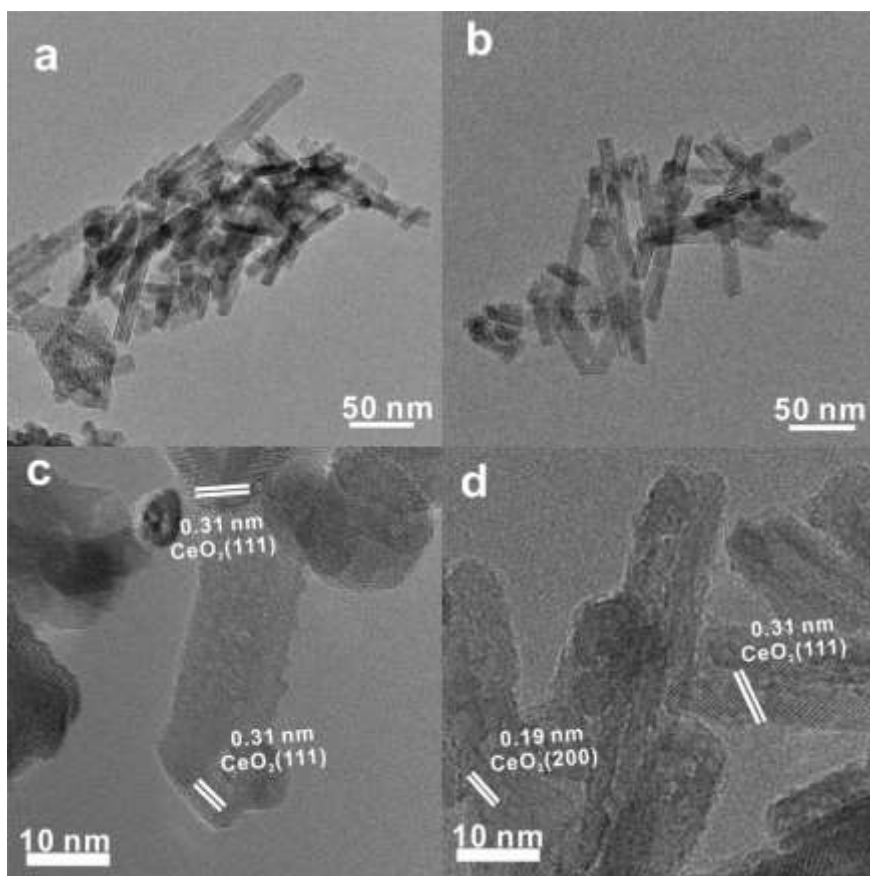

Fig. S4 TEM images of (a, c) Ru/CeO<sub>2</sub> and (b, d) Ru/CePr.

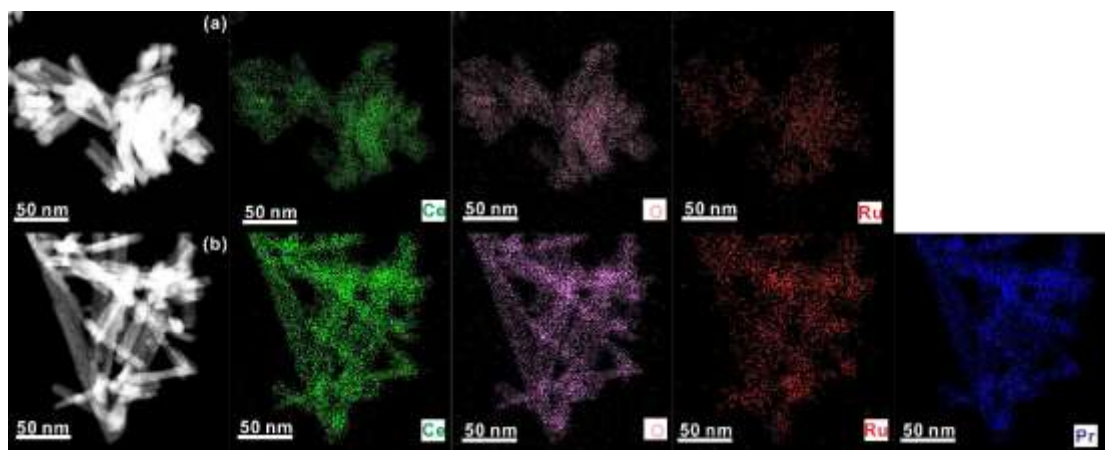

Fig. S5 HAADF-STEM elemental mapping of (a) Ru/CeO<sub>2</sub> and (b) Ru/CePr.



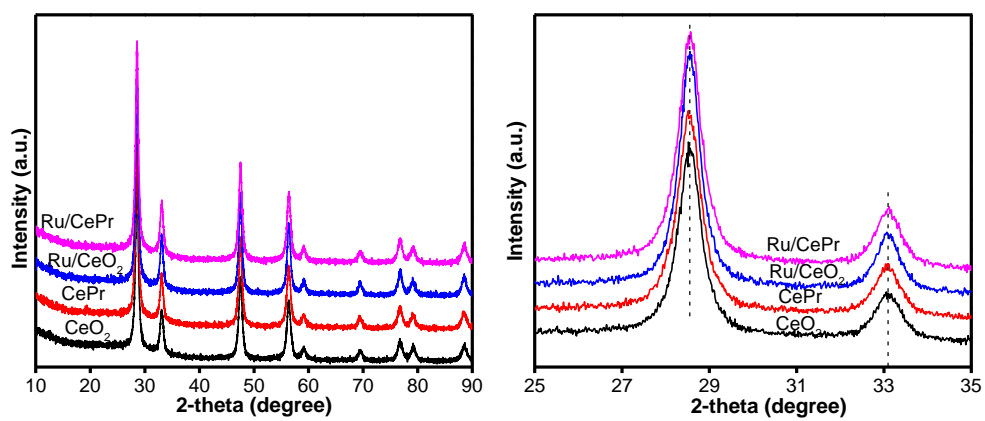

Fig. S6 XRD patterns of supports and Ru catalysts.

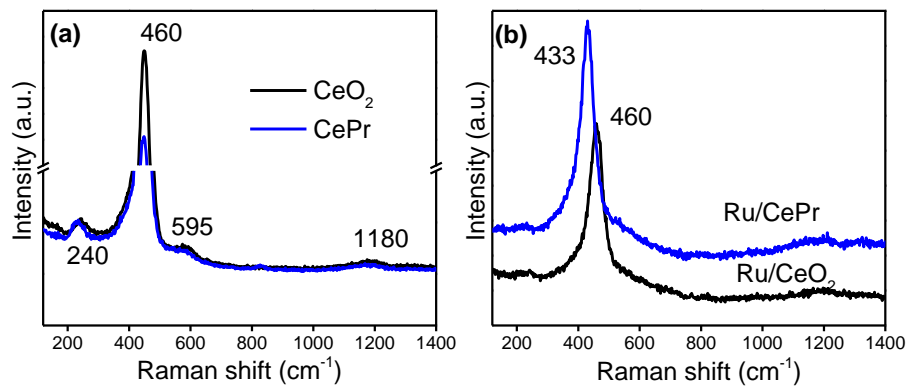

Fig. S7 Raman spectra of (a) supports and (b) Ru catalysts.

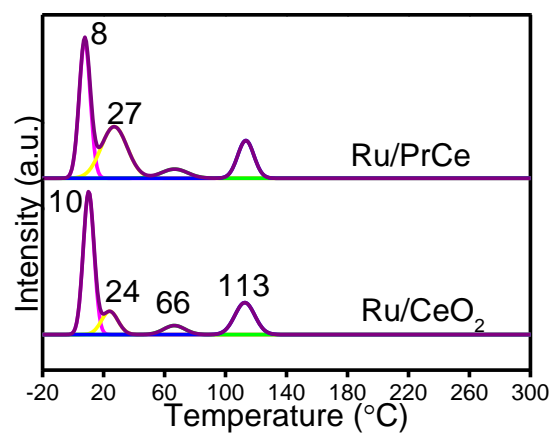

Fig. S8 H<sub>2</sub>-TPR profiles of the samples with oxidization in oxygen at 150 °C.

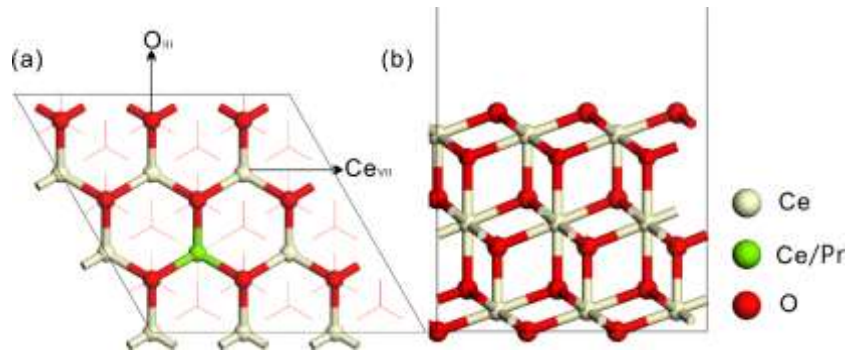

Fig. S9. Top view (a) and side view (b) of the  $\text{CeO}_2(111)$  surface with or without Pr modification.

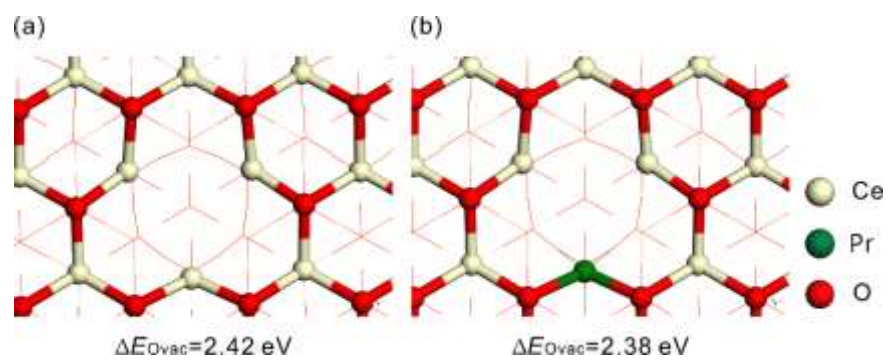

Fig. S10. Top view of the slab with one oxygen vacancy and its formation energy. (a) CeO<sub>2</sub>(111), (b) PrCeO<sub>2</sub>(111).

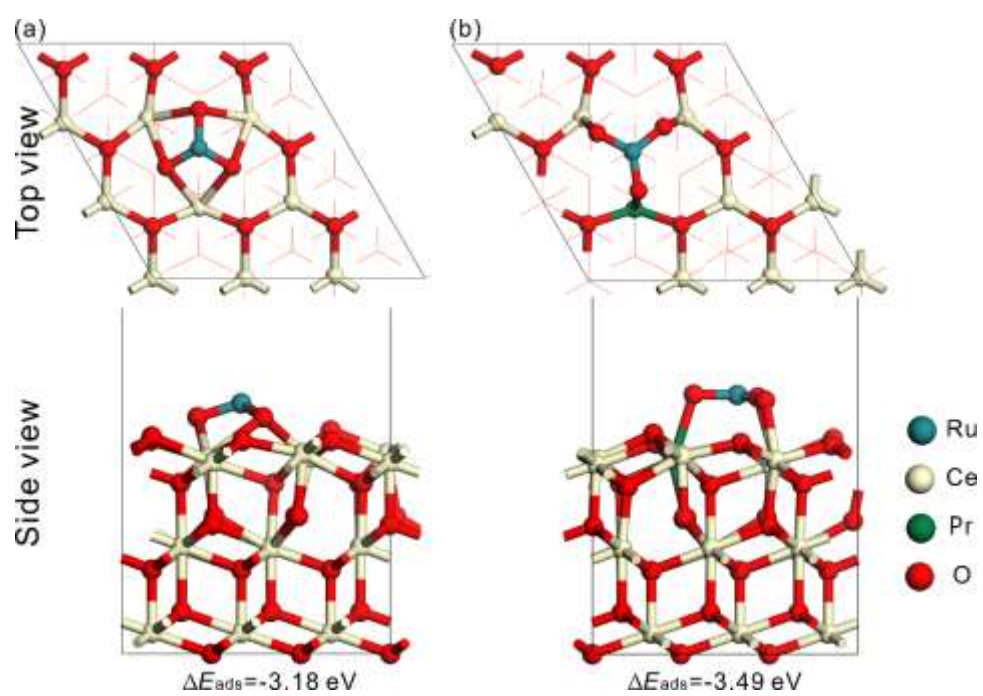

Fig. S11. Top view and side view of the Ru/CeO<sub>2</sub> (111) surface without or with Pr modification. (a) Ru/CeO<sub>2</sub> (111), (b) Ru/PrCeO<sub>2</sub> (111).

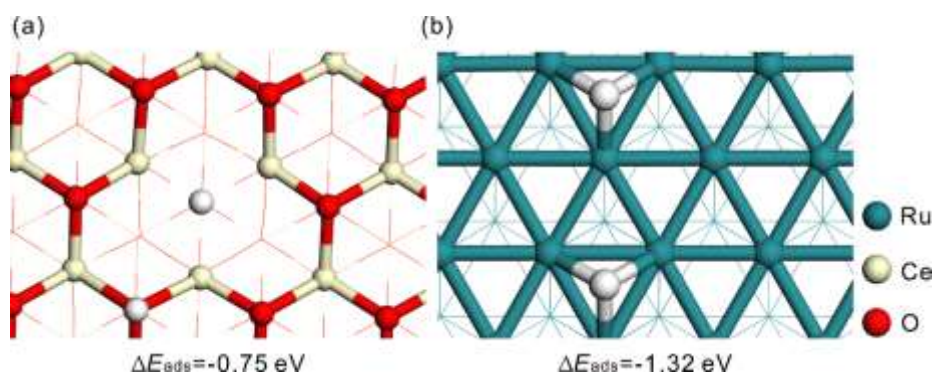

Fig. S12. The optimized structures of H<sub>2</sub> on CeO<sub>2</sub> (111) with oxygen vacancy (a) and (b) Ru(0001).

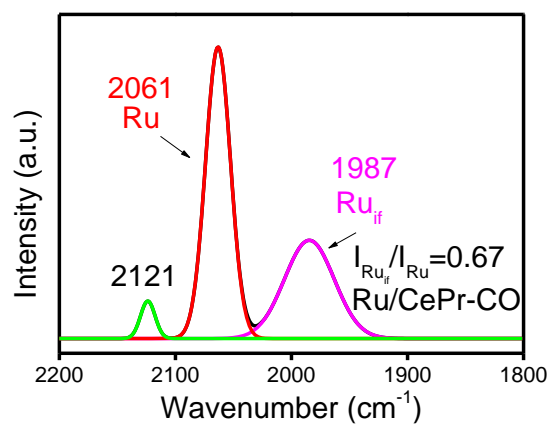

Fig. S13 The CO-IR spectra of Ru/CePr-CO catalyst.



## References

1. Oyama, S. T.; Zhang, X.; Lu, J.; Gu, Y.; Fujitani, T., Epoxidation of propylene with H<sub>2</sub> and O<sub>2</sub> in the explosive regime in a packed-bed catalytic membrane reactor. *J. Catal.* **2008**, *257* (1), 1–4.
2. Mears, D. E., Tests for Transport Limitations in Experimental Catalytic Reactors. *Industrial & Engineering Chemistry Process Design and Development* **1971**, *10* (4), 541–547.
3. Kresse, G.; Hafner, J., Ab initio molecular-dynamics simulation of the liquid-metal–amorphous-semiconductor transition in germanium. *Phys. Rev. B* **1994**, *49* (20), 14251-14269.
4. Kresse, G.; Hafner, J., Ab initio molecular dynamics for open-shell transition metals. *Phys. Rev. B* **1993**, *48* (17), 13115-13118.
5. Kresse, G.; Furthmüller, J., Efficiency of ab-initio total energy calculations for metals and semiconductors using a plane-wave basis set. *Comp. Mater. Sci.* **1996**, *6* (1), 15-50.
6. Kresse, G.; Furthmüller, J., Efficient iterative schemes for ab initio total-energy calculations using a plane-wave basis set. *Phys. Rev. B* **1996**, *54* (16), 11169-11186.
7. Kresse, G.; Hafner, J., Ab initio molecular dynamics for liquid metals. *Phys. Rev. B* **1993**, *47* (1), 558-561.
8. Kresse, G.; Joubert, D., From ultrasoft pseudopotentials to the projector augmented-wave method. *Phys. Rev. B* **1999**, *59* (3), 1758-1775.
9. Kresse, G.; Hafner, J., Ab initio molecular dynamics for open-shell transition metals. *Phys. Rev. B* **1993**, *48* (17), 13115-13118.
10. Capdevila-Cortada, M.; García-Melchor, M.; López, N., Unraveling the structure sensitivity in methanol conversion on CeO<sub>2</sub>: A DFT+ U study. *J. Catal.* **2015**, *327*, 58-64.
11. Tran, F.; Schweifer, J.; Blaha, P.; Schwarz, K.; Novák, P., PBE+ U calculations of the Jahn-Teller effect in PrO<sub>2</sub>. *Physical Review B* **2008**, *77* (8), 085123.
12. Monkhorst, H. J.; Pack, J. D., Special points for Brillouin-zone integrations. *Phys. Rev. B* **1976**, *13* (12), 5188-5192.
13. Tang, Y.; Zhao, S.; Long, B.; Liu, J.-C.; Li, J., On the Nature of Support Effects of Metal Dioxides MO<sub>2</sub> (M = Ti, Zr, Hf, Ce, Th) in Single-Atom Gold Catalysts: Importance of Quantum Primogenic Effect. *J. Phys. Chem. C* **2016**, *120* (31), 17514-17526.
14. Wu, Y.; Li, C.; Fang, B.; Wang, X.; Ni, J.; Lin, B.; Lin, J.; Jiang, L., Enhanced Ammonia Synthesis Performances of Ceria-supported Ru Catalysts via Introduction of Titanium. *Chem. Commun.*
15. Li, C.; Zhang, Z.; Zheng, Y.; Fang, B.; Ni, J.; Lin, J.; Lin, B.; Wang, X.; Jiang, L., Titanium modified Ru/CeO<sub>2</sub> catalysts for ammonia synthesis. *Chem. Eng. Sci.* **2022**, *251*, 117434.
16. Lin, B.; Heng, L.; Yin, H.; Fang, B.; Ni, J.; Wang, X.; Lin, J.; Jiang, L., Effects of Using Carbon-Coated Alumina as Support for Ba-Promoted Ru Catalyst in Ammonia Synthesis. *Ind. Eng. Chem. Res.* **2019**, *58* (24), 10285-10295.
17. Lin, B.; Wu, Y.; Fang, B.; Li, C.; Ni, J.; Wang, X.; Lin, J.; Jiang, L., Ru surface density effect on ammonia synthesis activity and hydrogen poisoning of ceria-supported Ru catalysts. *Chin. J. Catal.* **2021**, *42* (10), 1712–1723.
18. Fang, B.; Liu, F.; Zhang, C.; Li, C.; Ni, J.; Wang, X.; Lin, J.; Lin, B.; Jiang, L., Sacrificial Sucrose Strategy Achieved Enhancement of Ammonia Synthesis Activity over a Ceria-Supported Ru Catalyst. *ACS Sustain. Chem. Eng.* **2021**, *9* (27), 8962–8969.
19. Li, C.; Liu, F.; Shi, Y.; Zheng, Y.; Fang, B.; Lin, J.; Ni, J.; Wang, X.; Lin, B.; Jiang, L., Inducing the Metal–Support Interaction and Enhancing the Ammonia Synthesis Activity of Ceria-Supported

- Ruthenium Catalyst via  $\text{N}_2\text{H}_4$  Reduction. *ACS Sustain. Chem. Eng.* **2021**, *9* (13), 4885–4893.
20. Li, C.; Shi, Y.; Zhang, Z.; Ni, J.; Wang, X.; Lin, J.; Lin, B.; Jiang, L., Improving the ammonia synthesis activity of Ru/CeO<sub>2</sub> through enhancement of the metal–support interaction. *J. Energy Chem.* **2021**, *60*, 403–409.
21. Kitano, M.; Inoue, Y.; Sasase, M.; Kishida, K.; Kobayashi, Y.; Nishiyama, K.; Tada, T.; Kawamura, S.; Yokoyama, T.; Hara, M.; Hosono, H., Self-organized Ruthenium–Barium Core–Shell Nanoparticles on a Mesoporous Calcium Amide Matrix for Efficient Low-Temperature Ammonia Synthesis. *Angew. Chem. Int. Edit.* **2018**, *57* (10), 2648–2652.
22. Kitano, M.; Inoue, Y.; Yamazaki, Y.; Hayashi, F.; Kanbara, S.; Matsuishi, S.; Yokoyama, T.; Kim, S.-W.; Hara, M.; Hosono, H., Ammonia synthesis using a stable electride as an electron donor and reversible hydrogen store. *Nat. Chem.* **2012**, *4* (11), 934–940.
23. Lu, Y.; Li, J.; Tada, T.; Toda, Y.; Ueda, S.; Yokoyama, T.; Kitano, M.; Hosono, H., Water Durable Electride Y<sub>5</sub>Si<sub>3</sub>: Electronic Structure and Catalytic Activity for Ammonia Synthesis. *J. Am. Chem. Soc.* **2016**, *138* (12), 3970–3973.
24. Ma, Z.; Zhao, S.; Pei, X.; Xiong, X.; Hu, B., New insights into the support morphology-dependent ammonia synthesis activity of Ru/CeO<sub>2</sub> catalysts. *Catal. Sci. Technol.* **2017**, *7* (1), 191–199.
25. Sato, K.; Imamura, K.; Kawano, Y.; Miyahara, S.-i.; Yamamoto, T.; Matsumura, S.; Nagaoka, K., A low-crystalline ruthenium nano-layer supported on praseodymium oxide as an active catalyst for ammonia synthesis. *Chem. Sci.* **2017**, *8* (1), 674–679.
26. Lin, B.; Heng, L.; Fang, B.; Yin, H.; Ni, J.; Wang, X.; Lin, J.; Jiang, L., Ammonia Synthesis Activity of Alumina-Supported Ruthenium Catalyst Enhanced by Alumina Phase Transformation. *ACS Catal.* **2019**, *9* (3), 1635–1644.
27. Kobayashi, Y.; Tang, Y.; Kageyama, T.; Yamashita, H.; Masuda, N.; Hosokawa, S.; Kageyama, H., Titanium-Based Hydrides as Heterogeneous Catalysts for Ammonia Synthesis. *J. Am. Chem. Soc.* **2017**, *139* (50), 18240–18246.
28. Ogura, Y.; Sato, K.; Miyahara, S.-i.; Kawano, Y.; Toriyama, T.; Yamamoto, T.; Matsumura, S.; Hosokawa, S.; Nagaoka, K., Efficient ammonia synthesis over a Ru/La<sub>0.5</sub>Ce<sub>0.5</sub>O<sub>1.75</sub> catalyst pre-reduced at high temperature. *Chem. Sci.* **2018**, *9* (8), 2230–2237.
29. Ogura, Y.; Tsujimaru, K.; Sato, K.; Miyahara, S.-i.; Toriyama, T.; Yamamoto, T.; Matsumura, S.; Nagaoka, K., Ru/La<sub>0.5</sub>Pr<sub>0.5</sub>O<sub>1.75</sub> Catalyst for Low-Temperature Ammonia Synthesis. *ACS Sustain. Chem. Eng.* **2018**, *6* (12), 17258–17266.
